# Supplementary material for: Craniofacial Phenotypes and Genetics of DiGeorge Syndrome
Source: MDPI journal article supplement (doi:10.3390/jdb10020018), 2022-05-13
Supplement: s1 [file s1]

**Figure S1**

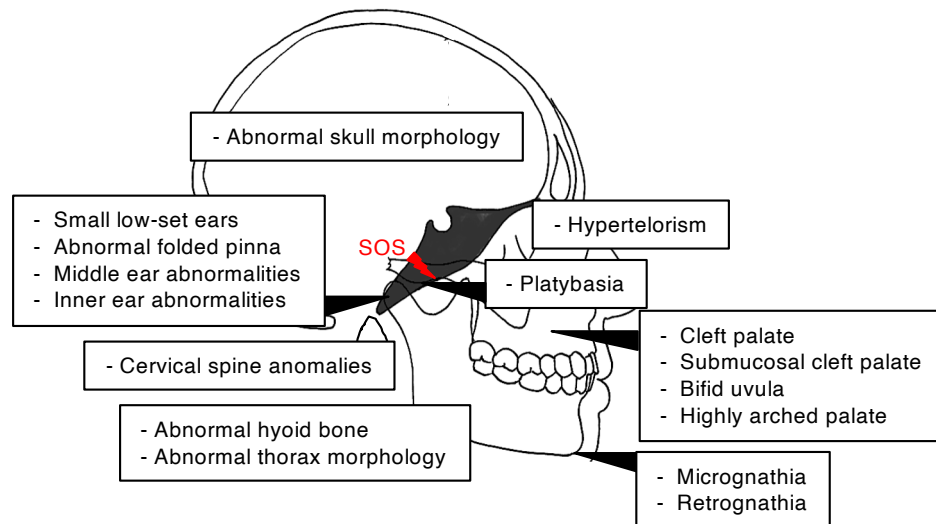

**Figure S1. Craniofacial and skeletal phenotypes of DGS/VCFS.**  
SOS, spheno-occipital synchondrosis.

**Figure S2**

**A**

| Symbol             | Description                                                 | Gene ID   |
|--------------------|-------------------------------------------------------------|-----------|
| <i>DGCR6</i>       | DiGeorge syndrome critical region gene 6                    | 8214      |
| <i>PRODH</i>       | proline dehydrogenase 1                                     | 5625      |
| <i>DGCR2</i>       | DiGeorge syndrome critical region gene 2                    | 9993      |
| <i>ESS2</i>        | ess-2 splicing factor homolog                               | 8220      |
| <i>TSSK2</i>       | testis specific serine kinase 2                             | 23617     |
| <i>GSC2</i>        | goosecoid homeobox 2                                        | 2928      |
| <i>FAM246C</i>     | family with sequence similarity 246 member C                | 117134596 |
| <i>SLC25A1</i>     | solute carrier family 25 member 1                           | 6576      |
| <i>CLTCL1</i>      | clathrin heavy chain like 1                                 | 8218      |
| <i>UFD1</i>        | ubiquitin recognition factor in ER associated degradation 1 | 7353      |
| <i>HIRA</i>        | histone cell cycle regulator                                | 7290      |
| <i>CDC45</i>       | cell division cycle 45                                      | 8318      |
| <i>MRPL40</i>      | mitochondrial ribosomal protein L40                         | 64976     |
| <i>C22orf39</i>    | chromosome 22 open reading frame 39                         | 128977    |
| <i>CLDN5</i>       | claudin 5                                                   | 7122      |
| <i>TBX1</i>        | T-box transcription factor 1                                | 6899      |
| <i>SEPTIN5</i>     | septin 5                                                    | 5413      |
| <i>SEPT5-GP1BB</i> | SEPT5-GP1BB readthrough                                     | 100526833 |
| <i>GP1BB</i>       | glycoprotein Ib platelet subunit beta                       | 2812      |
| <i>GNB1L</i>       | G protein subunit beta 1 like                               | 54584     |
| <i>RTL10</i>       | retrotransposon Gag like 10                                 | 79680     |
| <i>TXNRD2</i>      | thioredoxin reductase 2                                     | 10587     |
| <i>COMT</i>        | catechol-O-methyltransferase                                | 1312      |
| <i>ARVCF</i>       | ARVCF delta catenin family member                           | 421       |
| <i>TANGO2</i>      | transport and golgi organization 2 homolog                  | 128989    |
| <i>TRMT2A</i>      | tRNA methyltransferase 2 homolog A                          | 27037     |
| <i>RANBP1</i>      | RAN binding protein 1                                       | 5902      |
| <i>CCDC188</i>     | coiled-coil domain containing 188                           | 388849    |
| <i>DGCR8</i>       | DGCR8 microprocessor complex subunit                        | 54487     |
| <i>ZDHHC8</i>      | zinc finger DHHC-type palmitoyltransferase 8                | 29801     |
| <i>RTN4R</i>       | reticulon 4 receptor                                        | 65078     |
| <i>DGCR6L</i>      | DiGeorge syndrome critical region gene 6 like               | 85359     |
| <i>AC007326.13</i> | novel protein                                               |           |

**B**

| Category                  | ID                    | Name                                   | Source                    | p-value  | q-value Bonferroni | q-value FDR B&Y | Gene List                                                                                                                                                                                                                                                                                                                                                                                                                                                                  |
|---------------------------|-----------------------|----------------------------------------|---------------------------|----------|--------------------|-----------------|----------------------------------------------------------------------------------------------------------------------------------------------------------------------------------------------------------------------------------------------------------------------------------------------------------------------------------------------------------------------------------------------------------------------------------------------------------------------------|
| <b>Molecular Function</b> |                       |                                        |                           |          |                    |                 |                                                                                                                                                                                                                                                                                                                                                                                                                                                                            |
| <b>Biological Process</b> | No results to display |                                        |                           |          |                    |                 |                                                                                                                                                                                                                                                                                                                                                                                                                                                                            |
| <b>Cellular Component</b> |                       |                                        |                           |          |                    |                 |                                                                                                                                                                                                                                                                                                                                                                                                                                                                            |
| <b>Domain</b>             | IPR010849             | Gonadal                                | InterPro                  | 7.43E-06 | 1.39E-03           | 4.04E-03        | <i>DGCR6</i> , <i>DGCR6L</i>                                                                                                                                                                                                                                                                                                                                                                                                                                               |
|                           | PF07324               | DGCR6                                  | Pfam                      | 7.43E-06 | 1.39E-03           | 4.04E-03        | <i>DGCR6</i> , <i>DGCR6L</i>                                                                                                                                                                                                                                                                                                                                                                                                                                               |
| <b>Pathway</b>            | M39787                | 22q11.2 copy number variation syndrome | MSigDB C2 BIOCARTA (v7.3) | 1.28E-60 | 2.45E-58           | 1.43E-57        | <i>TSSK2</i> , <i>RTL10</i> , <i>DGCR2</i> , <i>RANBP1</i> , <i>MRPL40</i> , <i>C22orf39</i> , <i>CLDN5</i> , <i>DGCR6</i> , <i>DGCR8</i> , <i>CLTCL1</i> , <i>TXNRD2</i> , <i>ESS2</i> , <i>TANGO2</i> , <i>TRMT2A</i> , <i>COMT</i> , <i>SEPTIN5</i> , <i>ARVCF</i> , <i>ZDHHC8</i> , <i>DGCR6L</i> , <i>GSC2</i> , <i>SLC25A1</i> , <i>TBX1</i> , <i>CCDC188</i> , <i>RTN4R</i> , <i>GNB1L</i> , <i>PRODH</i> , <i>UFD1</i> , <i>HIRA</i> , <i>GP1BB</i> , <i>CDC45</i> |

**Figure S2. Human genes in the proximal deletion of 1.5-Mb on the 22q11.2 locus.**

**A.** Human genes in the proximal deletion of 1.5-Mb on the 22q11.2 locus.

**B.** Classification of human genes in the proximal deletion of 1.5-Mb. Gene set enrichment analysis was performed using the ToppGene Suite (<https://toppgene.cchmc.org>) with a Bonferroni corrected q-value cutoff of 0.05.
